# Supplementary material
Source: PubMed Central journal article supplement (PMC1450231)

Closed

Open

AC

L

VC

\*

\*

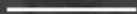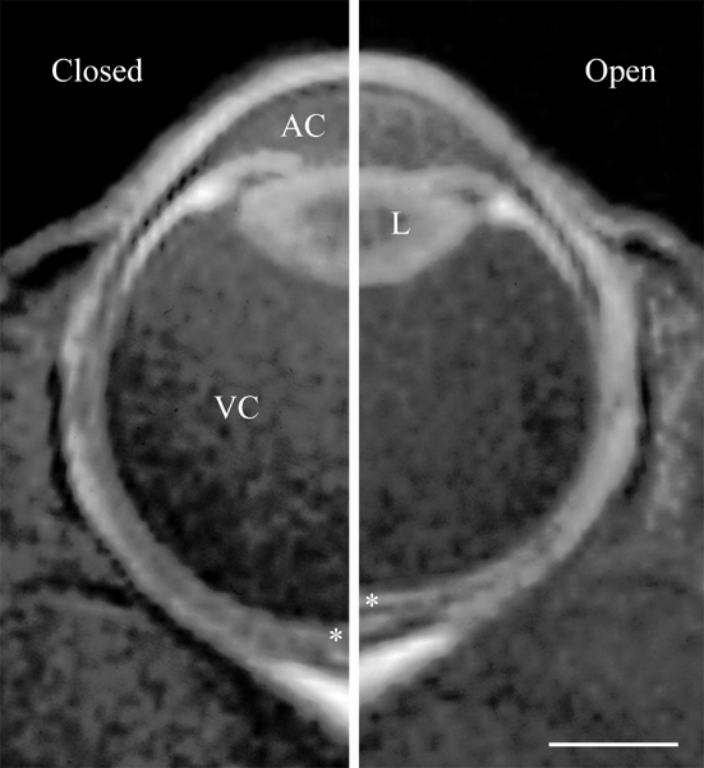

Supplement: pnas_0600589103_1.pdf [file pnas_0600589103_1.pdf]

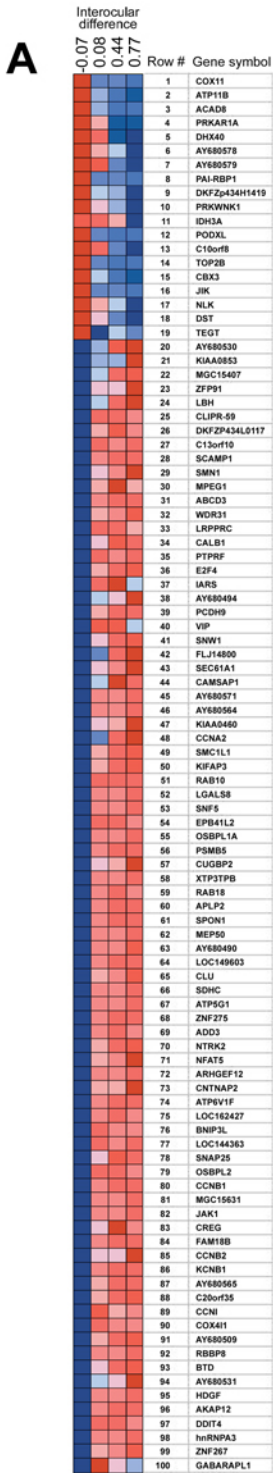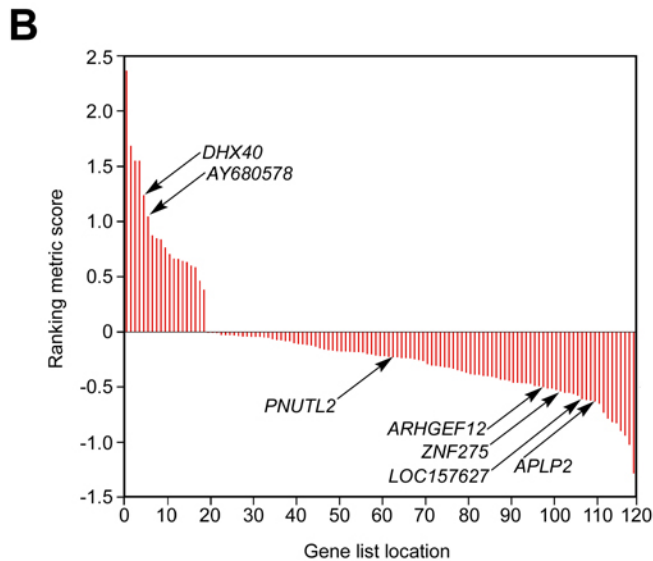

Supplement: pnas_0600589103_2.pdf [file pnas_0600589103_2.pdf]

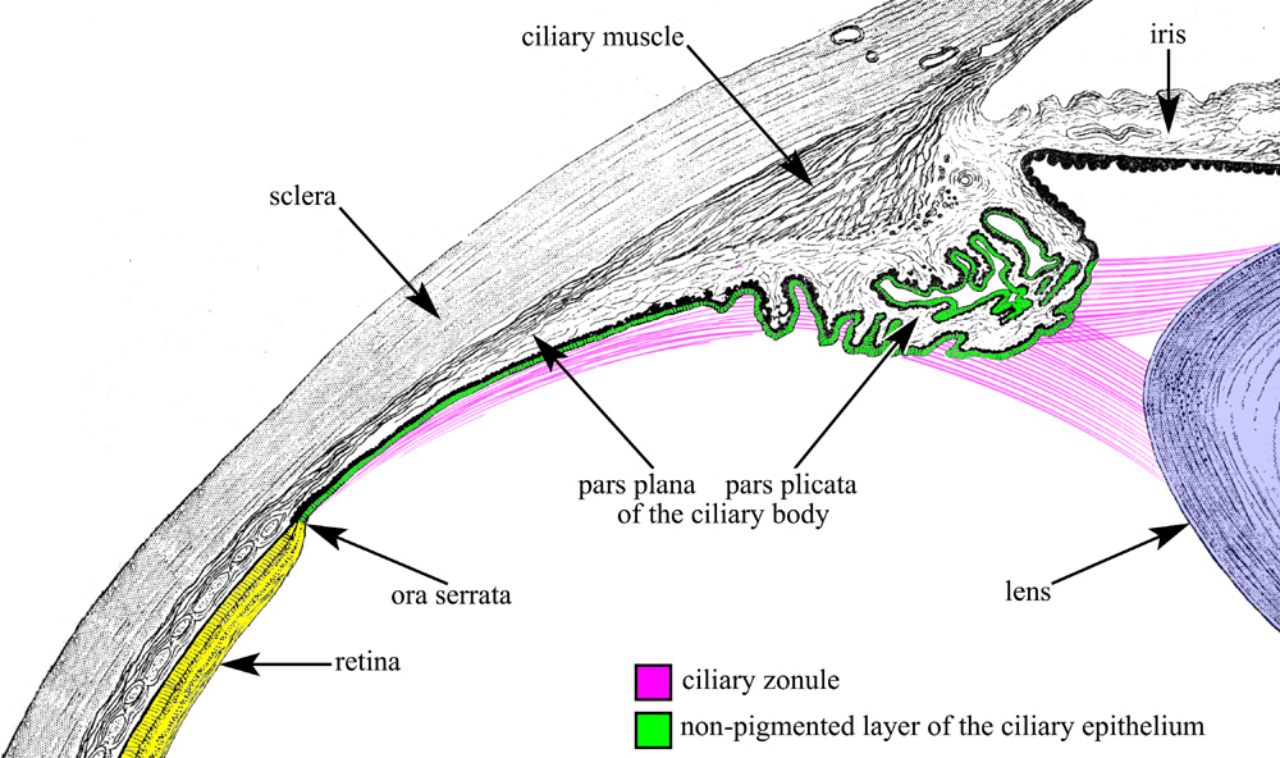

Supplement: pnas_0600589103_3.pdf [file pnas_0600589103_3.pdf]
